# Supplementary material
Source: PubMed Central journal article supplement (PMC3889745)
Supplement: JCM.01375-13_zjm999092894so1.pdf [file JCM.01375-13_zjm999092894so1.pdf]

**Supplementary Table S1. General information for the hospitals and cities which participated in the present study.**

| Province          | City     | City population (million) | No. of hospitals | In participated hospitals |                           |
|-------------------|----------|---------------------------|------------------|---------------------------|---------------------------|
|                   |          |                           | participated     | No. of beds               | Outpatient (million/year) |
| <b>East China</b> |          |                           | 18               |                           |                           |
| Shanghai          | Shanghai | 16                        | 3                | 1600-2000                 | 2.7-3.2                   |
| Jiangsu           | Nanjing  | 7                         | 1                | 1200                      | 1.2                       |
| Shandong          | Qingdao  | 4                         | 1                | 2000                      | 1.3                       |
|                   | Binzhou  | 4                         | 1                | 2000                      | 0.5                       |
|                   | Zibo     | 5                         | 1                | 1000                      | 0.4                       |
| Zhejiang          | Hangzhou | 6                         | 2                | 1500-2500                 | 1.9-2.6                   |
|                   | Huzhou   | 3                         | 1                | 1100                      | 0.6                       |
|                   | Jiaxing  | 3                         | 1                | 1000                      | 1.4                       |
|                   | Lishui   | 3                         | 1                | 1000                      | 0.9                       |

---

|         |                     |    |    |           |         |
|---------|---------------------|----|----|-----------|---------|
|         | Ningbo              | 4  | 1  | 1200      | 1.2     |
|         | Quzhou              | 3  | 1  | 1000      | 0.7     |
|         | Shaoxing            | 4  | 1  | 1700      | 1.2     |
|         | Taizhou             | 4  | 1  | 1500      | 1.6     |
|         | Wenzhou             | 3  | 1  | 1600      | 2.2     |
|         | Zhoushan            | 2  | 1  | 1000      | 0.7     |
|         | <b>Middle China</b> |    | 11 |           |         |
| Anhui   | Hefei               | 3  | 3  | 1200-2600 | 0.7-2.1 |
| Henan   | Zhengzhou           | 4  | 2  | 2800-5000 | 1.0-3.0 |
| Hubei   | Wuhan               | 10 | 2  | 1000-2500 | 0.5-2.6 |
|         | Xiangfan            | 4  | 1  | 1000      | 0.5     |
| Hunan   | Changsha            | 3  | 1  | 1000      | 0.4     |
| Jiangxi | Nanchang            | 2  | 2  | 1000-1600 | 0.4     |

---

---

|                        |              |    |    |           |         |
|------------------------|--------------|----|----|-----------|---------|
| <b>North China</b>     |              |    | 9  |           |         |
| Beijing                | Beijing      | 14 | 3  | 1000-1800 | 0.4-2.3 |
| Tianjin                | Tianjing     | 10 | 3  | 1000-1600 | 0.5-1.2 |
| Hebei                  | Shijiazhuang | 3  | 1  | 1000      | 0.8     |
| Neimenggu              | Hohhot       | 3  | 1  | 1700      | 1.0     |
| Shanxi                 | Taiyuan      | 3  | 1  | 1000      | 0.8     |
| <b>Northeast China</b> |              |    | 6  |           |         |
| Heilongjiang           | Harbin       | 10 | 2  | 1000      | 0.4-1.2 |
| Jilin                  | Changchun    | 4  | 1  | 1200      | 1.4     |
|                        | Jilin        | 5  | 1  | 1000      | 0.6     |
| Liaoning               | Shenyang     | 6  | 2  | 2300-4800 | 2.4-3.0 |
| <b>Northwest China</b> |              |    | 10 |           |         |
| Gansu                  | Lanzhou      | 3  | 1  | 1000      | 0.4     |

---

---

|                        |           |    |   |           |         |
|------------------------|-----------|----|---|-----------|---------|
| Qinghai                | Xining    | 2  | 3 | 1000-1300 | 0.6-1.0 |
| Shaanxi                | Xian      | 7  | 2 | 1100-3200 | 1.1-2.0 |
|                        | Hanzhong  | 4  | 1 | 1000      | 0.4     |
| Xinjiang               | Urumchi   | 3  | 2 | 2100      | 0.6-0.8 |
|                        | Shihezi   | 2  | 1 | 1200      | 0.5     |
| <b>South China</b>     |           |    | 9 |           |         |
| Guangdong              | Guangzhou | 13 | 3 | 1000-2000 | 1.0-2.2 |
| Guangxi                | Guilin    | 6  | 1 | 1000      | 0.5     |
|                        | Nanning   | 3  | 1 | 2300      | 1.3     |
|                        | Qinzhou   | 3  | 1 | 1000      | 0.4     |
| Hainan                 | Haikou    | 2  | 3 | 1200-1500 | 0.4-0.9 |
| <b>Southwest China</b> |           |    | 6 |           |         |
| Guizhou                | Guiyang   | 3  | 1 | 2000      | 0.7     |

---

---

|         |           |   |   |           |         |
|---------|-----------|---|---|-----------|---------|
| Sichuan | Chengdu   | 6 | 2 | 2000-2300 | 1.0-1.6 |
|         | Panzhihua | 2 | 1 | 1000      | 0.4     |
| Yunnan  | Kunming   | 4 | 2 | 1000-1800 | 0.8-2.4 |

---
